# Supplementary material for: Spirolactam capped cyanine dyes for designing NIR probes to target multiple metal ions
Source: Royal Society of Chemistry journal article supplement (doi:10.1039/c7ra03246c), 2017-01-01
Supplement: c7ra03246c1.pdf [file c7ra03246c1.pdf]

Electronic Supplementary Information

# Spirolactam Capped Cyanine Dyes for Designing NIR Probes to Target Multiple Metal Ions

Chirantan Kar<sup>a</sup>, Yutaka Shindo<sup>b</sup>, Kotaro Oka<sup>b</sup>, Shigeru Nishiyama<sup>c</sup>, Koji Suzuki<sup>a</sup> and Daniel Citterio<sup>a</sup>

<sup>a</sup>Department of Applied Chemistry, <sup>b</sup>Department of Biosciences and Informatics and <sup>c</sup>Department of Chemistry, Faculty of Science and Technology Keio University, 3-14-1 Hiyoshi, Kohoku-ku, Yokohama 223-8522, Japan

## Table of Content

|                                                            |    |
|------------------------------------------------------------|----|
| 1. Optical properties of IR-NCS and IR-PYR in Methanol     | S2 |
| 2. Metal dependent UV visible spectra of IR-NCS and IR-PYR | S2 |
| 3. Benesi-Hildebrand Plot                                  | S2 |
| 4. Dihedral angle comparison                               | S3 |
| 5. Absorbance spectra of IR-NCS in acidic and basic medium | S3 |
| 6. Job's plot diagrams                                     | S4 |
| 7. pH dependent fluorescence of IR-NCS and IR-PYR          | S5 |
| 7. Mass spectra of the compounds.                          | S6 |
| 8. NMR spectra of the compounds                            | S9 |

Table S1: Optical properties of IR-NCS and IR-PYR in Methanol.

| Probe  | $\lambda_{\text{abs}}$ (nm) <sup>a</sup> | $\lambda_{\text{em}}$ (nm) <sup>b</sup> | Stokes shift (nm) | $\epsilon_{\text{max}}$ (M <sup>-1</sup> cm <sup>-1</sup> ) | $\Phi_f$ <sup>c</sup> |
|--------|------------------------------------------|-----------------------------------------|-------------------|-------------------------------------------------------------|-----------------------|
| IR-NCS | 763                                      | 784                                     | 21                | 268800                                                      | 0.0619                |
| IR-PYR | 766                                      | 784                                     | 18                | 88000                                                       | 0.0982                |

<sup>a</sup> The maximal absorption of the dye; <sup>b</sup> The maximal emission of the dye; <sup>c</sup>  $\Phi_f$  is the relative fluorescence quantum yield estimated by using ICG ( $\Phi_f = 0.13$  in DMSO) as a fluorescence standard.

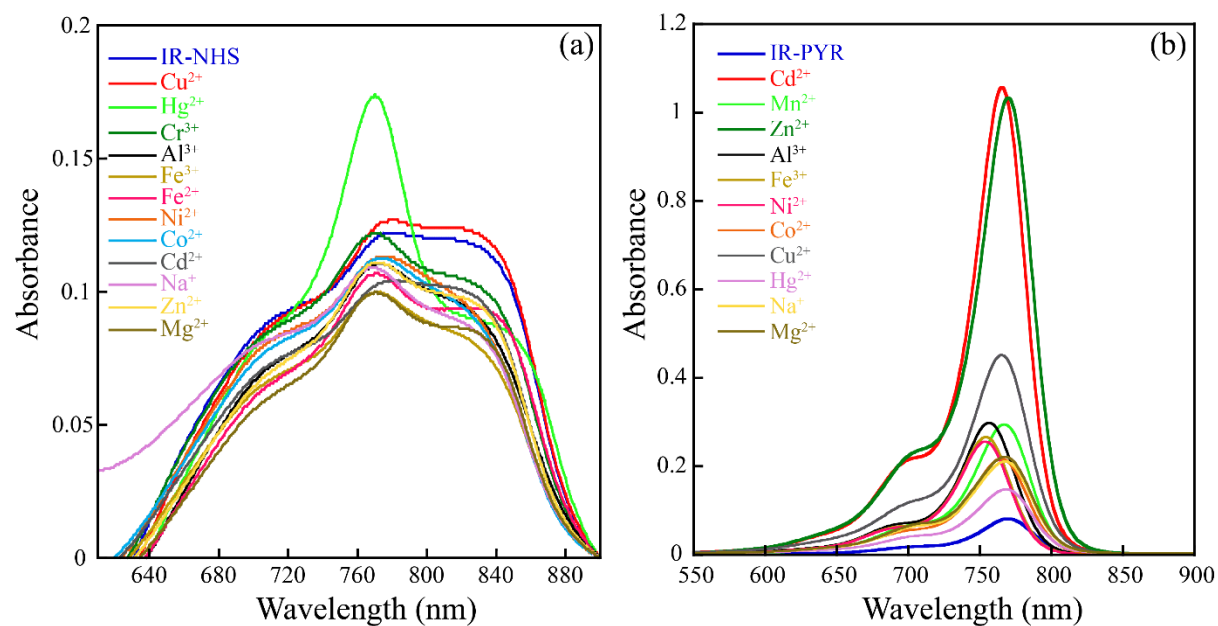

Figure S1: UV/Vis spectra of IR-NCS and IR-PYR in presence of various metal ions.

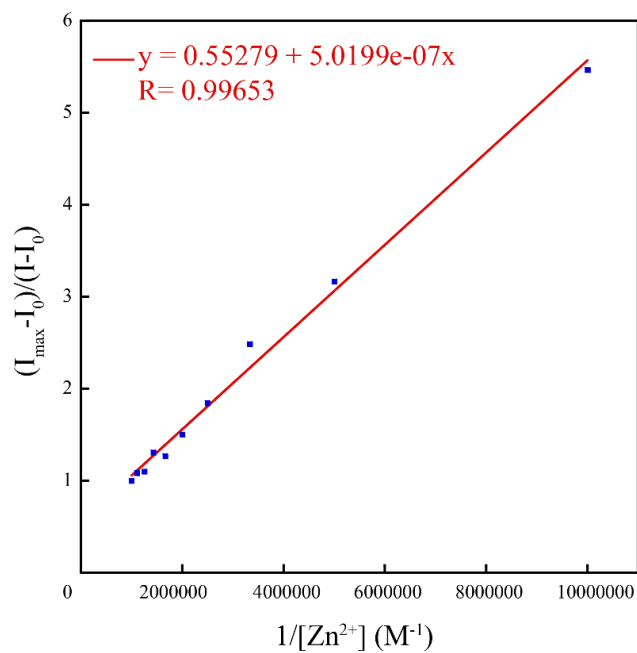

Figure S2: Binding constant for the 1:1 IR-PYR-Zn complex, calculated using Benesi-Hildebrand method.

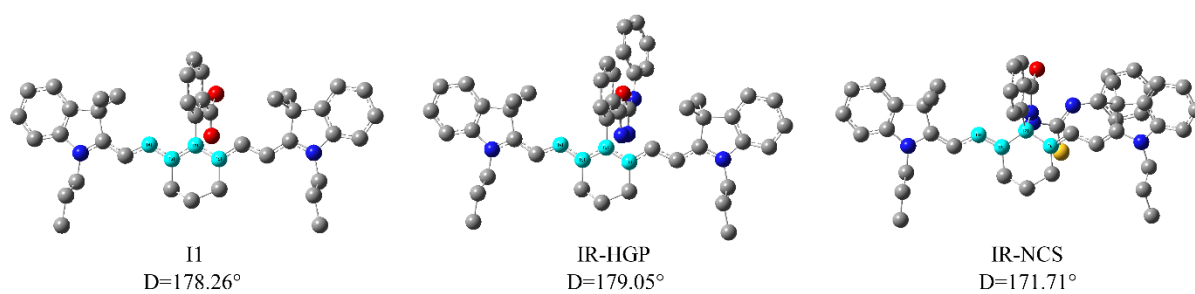

Figure S3: Dihedral angles (between the bonds linking the highlighted atoms) of I1, IR-HGP and IR-NCS.

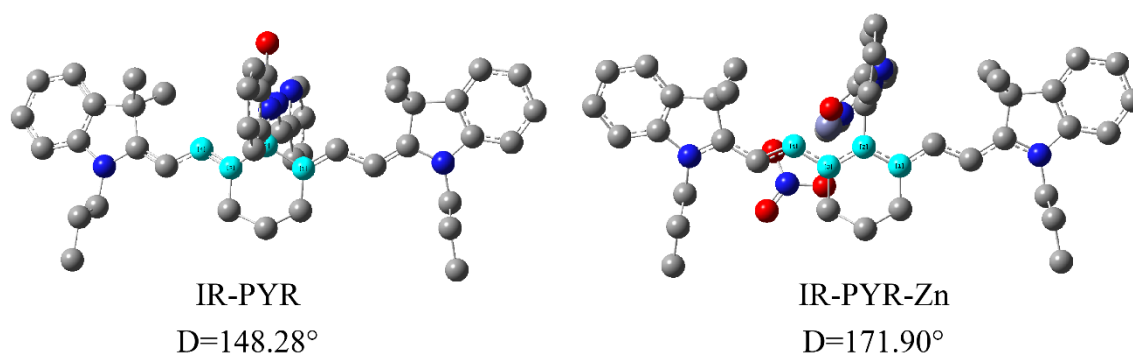

Figure S4: Dihedral angles (between the bonds linking the highlighted atoms) of IR-PYR and IR-PYR-Zn.

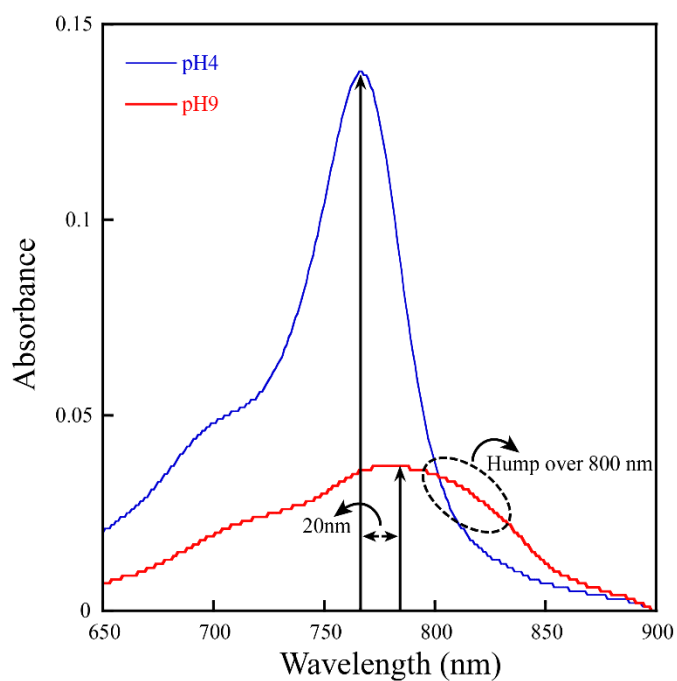

Figure S5: Absorbance spectra of 10  $\mu$ M IR-NCS in solutions of pH 4 and pH 9.

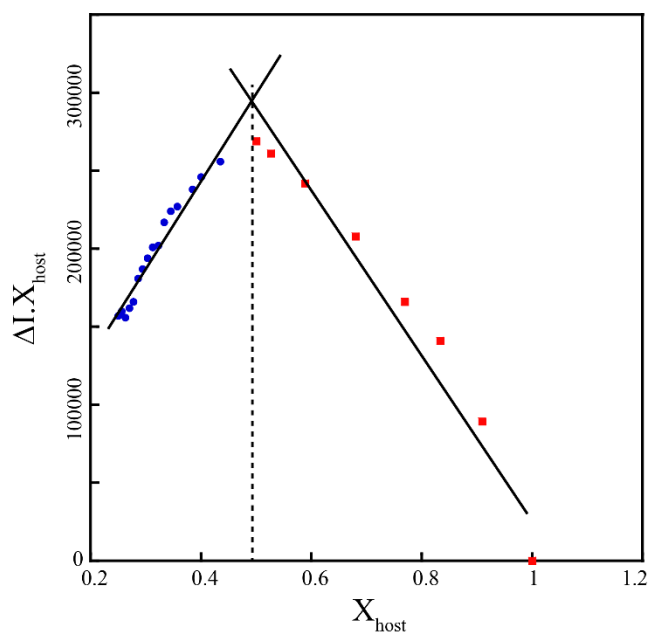

Figure S6: Job's plot diagram for the IR-PYR and  $\text{Zn}^{2+}$  metal ion complex.  $X_{\text{host}}$  represent the mole fraction of IR-PYR and  $\Delta I$  represent the change in fluorescence intensity.

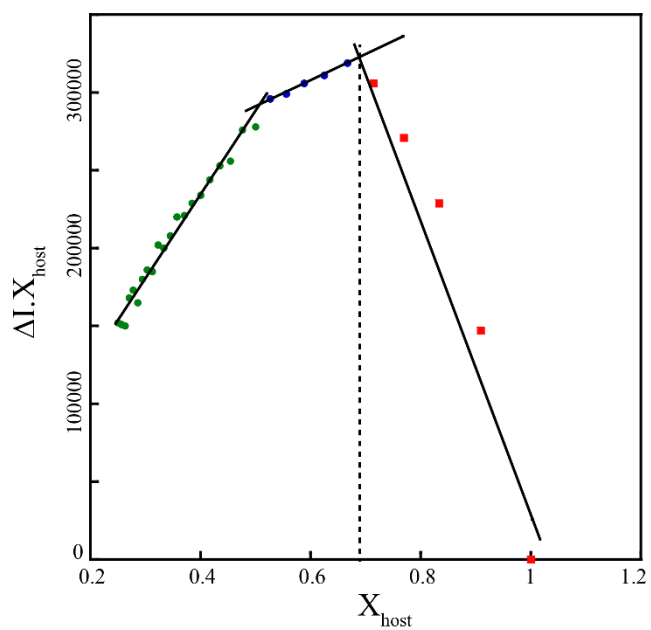

Figure S7: Job's plot diagram for the IR-PYR and  $\text{Cd}^{2+}$  metal ion complex.  $X_{\text{host}}$  represent the mole fraction of IR-PYR and  $\Delta I$  represent the change in fluorescence intensity.

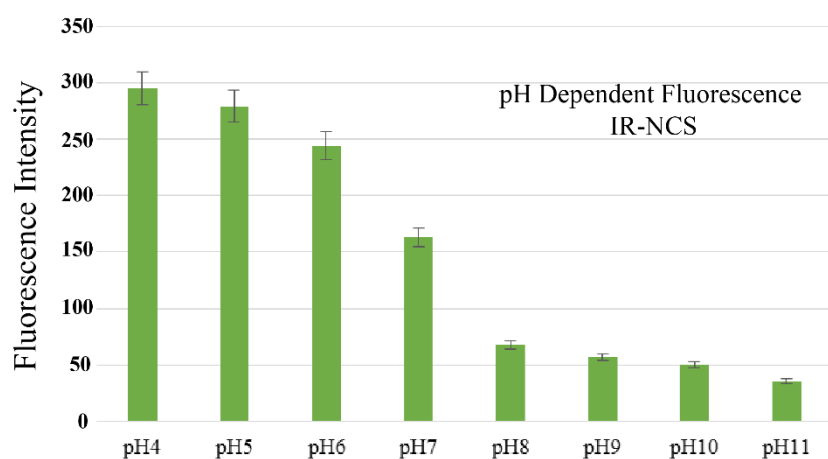

Figure S8: pH dependent fluorescence of IR-NCS.

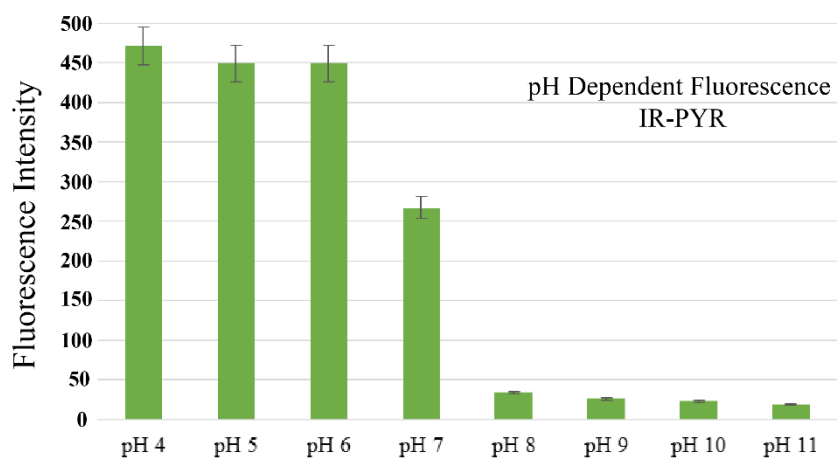

Figure S9: pH dependent fluorescence of IR-PYR

**Elemental Composition Report**

Page 1

**Single Mass Analysis**

Tolerance = 5.0 PPM / DBE: min = -1.5, max = 50.0

Element prediction: Off

Number of isotope peaks used for i-FIT = 3

Monoisotopic Mass, Even Electron Ions

1 formula(e) evaluated with 1 results within limits (up to 50 closest results for each mass)

Elements Used:

C: 49-49 H: 53-54 N: 5-5 O: 1-1

Kar4

20160405-04 21 (0.353) Cm (20:23)

1: TOF MS ES+  
3.20e+004

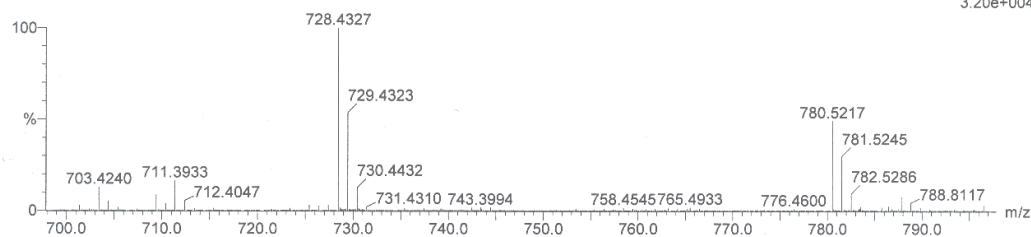

Minimum: -1.5  
Maximum: 3.0 5.0 50.0

| Mass     | Calc. Mass | mDa  | PPM  | DBE  | i-FIT | i-FIT (Norm) | Formula      |
|----------|------------|------|------|------|-------|--------------|--------------|
| 728.4327 | 728.4328   | -0.1 | -0.1 | 25.5 | 282.0 | 0.0          | C49 H54 N5 O |

Figure S10: Mass spectral data of IR-PYR (C<sub>49</sub>H<sub>54</sub>N<sub>5</sub>O).

**Elemental Composition Report**

Page 1

**Single Mass Analysis**

Tolerance = 5.0 PPM / DBE: min = -1.5, max = 50.0

Element prediction: Off

Number of isotope peaks used for i-FIT = 3

Monoisotopic Mass, Even Electron Ions

1 formula(e) evaluated with 1 results within limits (up to 50 best isotopic matches for each mass)

Elements Used:

C: 50-50 H: 55-56 N: 5-5 O: 1-1 S: 1-1

Kar

20151127-02 21 (0.348) Cm (21)

1: TOF MS ES+  
1.96e+005

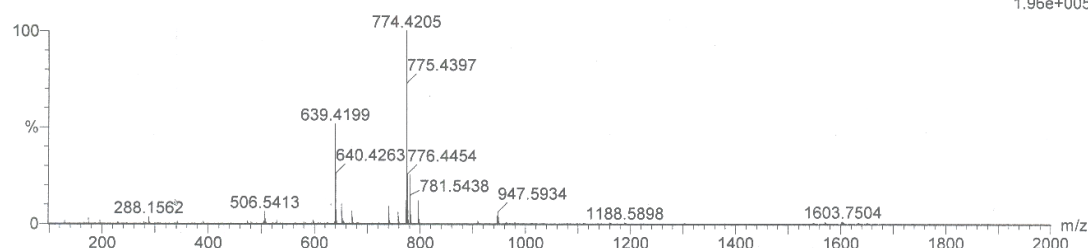

Minimum: -1.5  
Maximum: 3.0 5.0 50.0

| Mass     | Calc. Mass | mDa  | PPM  | DBE  | i-FIT | i-FIT (Norm) | Formula        |
|----------|------------|------|------|------|-------|--------------|----------------|
| 774.4205 | 774.4206   | -0.1 | -0.1 | 25.5 | 182.7 | 0.0          | C50 H56 N5 O S |

Figure S11: Mass spectral data of IR-NCS (C<sub>50</sub>H<sub>56</sub>N<sub>5</sub>OS).

**Elemental Composition Report**

**Single Mass Analysis**

Tolerance = 3.0 mDa / DBE: min = -1.5, max = 50.0

Element prediction: Off

Number of isotope peaks used for i-FIT = 3

Monoisotopic Mass, Even Electron Ions

1 formula(e) evaluated with 1 results within limits (up to 50 best isotopic matches for each mass)

Elements Used:

C: 43-43 H: 50-52 N: 4-4 O: 1-1

Kar2

20151102-05 44 (0.711) Cm (43:46)

1: TOF MS ES+  
2.13e+003

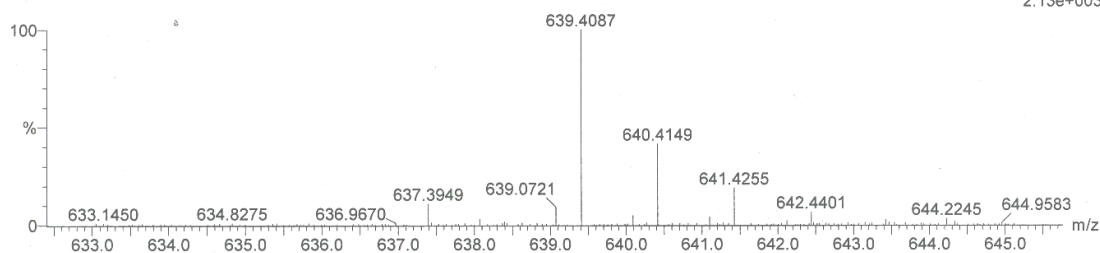

Minimum: -1.5  
Maximum: 3.0 10.0 50.0

| Mass     | Calc. Mass | mDa | PPM | DBE  | i-FIT | i-FIT (Norm) | Formula      |
|----------|------------|-----|-----|------|-------|--------------|--------------|
| 639.4087 | 639.4063   | 2.4 | 3.8 | 20.5 | 147.6 | 0.0          | C43 H51 N4 O |

Figure S12: Mass spectral data of I2 (C<sub>43</sub>H<sub>51</sub>N<sub>4</sub>O).

**Elemental Composition Report**

**Single Mass Analysis**

Tolerance = 500.0 PPM / DBE: min = -1.5, max = 50.0

Element prediction: Off

Number of isotope peaks used for i-FIT = 3

Monoisotopic Mass, Even Electron Ions

1 formula(e) evaluated with 1 results within limits (up to 50 best isotopic matches for each mass)

Elements Used:

C: 43-43 H: 49-50 N: 2-2 O: 2-2

Kar

20151028-04 66 (1.081) Cm (62:71)

1: TOF MS ES+  
1.25e+004

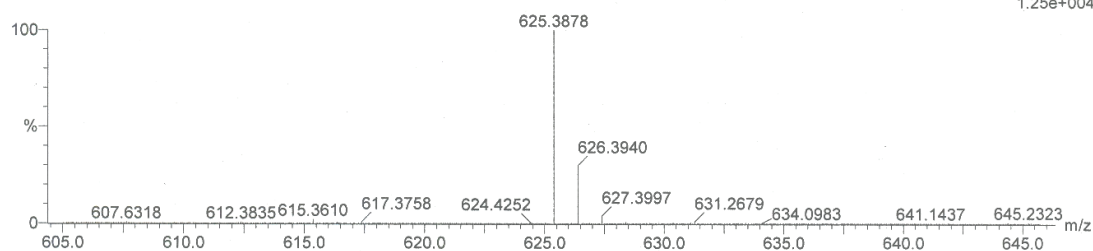

Minimum: -1.5  
Maximum: 500.0 500.0 50.0

| Mass     | Calc. Mass | mDa | PPM  | DBE  | i-FIT | i-FIT (Norm) | Formula       |
|----------|------------|-----|------|------|-------|--------------|---------------|
| 625.3878 | 625.3794   | 8.4 | 13.4 | 20.5 | 131.5 | 0.0          | C43 H49 N2 O2 |

Figure S13: Mass spectral data of I1 (C<sub>43</sub>H<sub>49</sub>N<sub>2</sub>O<sub>2</sub>).

**Elemental Composition Report**

**Single Mass Analysis**

Tolerance = 3.0 mDa / DBE: min = -1.5, max = 50.0  
 Element prediction: Off  
 Number of isotope peaks used for i-FIT = 3

Monoisotopic Mass, Even Electron Ions  
 1 formula(e) evaluated with 1 results within limits (up to 50 closest results for each mass)  
 Elements Used:  
 C: 50-50 H: 53-54 N: 5-5 O: 1-1  
 Kar Hg complex  
 20160325-01 28 (0.456) Cm (28)

1: TOF MS ES+  
4.03e+004

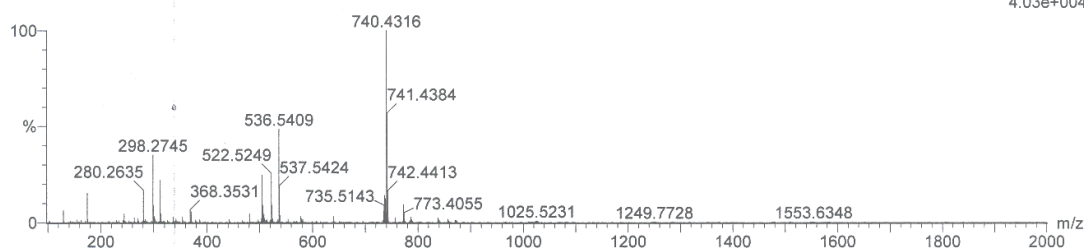

Minimum: -1.5  
 Maximum: 3.0 500.0 50.0

| Mass     | Calc. Mass | mDa  | PPM  | DBE  | i-FIT | i-FIT (Norm) | Formula      |
|----------|------------|------|------|------|-------|--------------|--------------|
| 740.4316 | 740.4328   | -1.2 | -1.6 | 26.5 | 132.3 | 0.0          | C50 H54 N5 O |

Figure S14: Mass spectral data of IR-HGP (C<sub>50</sub>H<sub>54</sub>N<sub>5</sub>O).

**Elemental Composition Report**

**Single Mass Analysis**

Tolerance = 300.0 mDa / DBE: min = -1.5, max = 50.0  
 Element prediction: Off  
 Number of isotope peaks used for i-FIT = 3

Monoisotopic Mass, Even Electron Ions  
 1 formula(e) evaluated with 1 results within limits (up to 50 best isotopic matches for each mass)  
 Elements Used:  
 C: 49-49 H: 53-53 N: 6-6 O: 4-4 Zn: 1-1

Kar Zn  
 20160513-02 33 (0.545) Cm (33:37)

1: TOF MS ES+  
1.15e+004

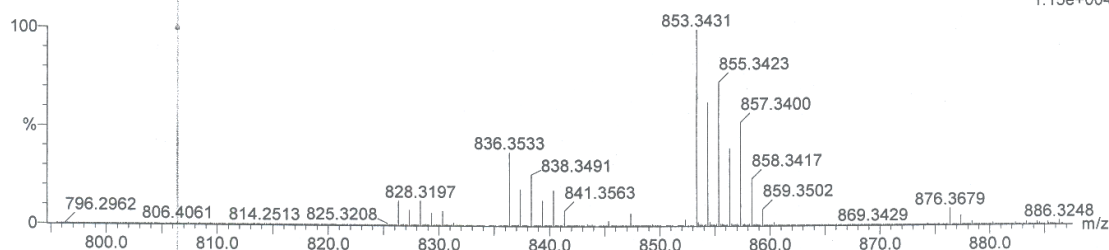

Minimum: -1.5  
 Maximum: 300.0 10.0 50.0

| Mass     | Calc. Mass | mDa | PPM | DBE  | i-FIT | i-FIT (Norm) | Formula          |
|----------|------------|-----|-----|------|-------|--------------|------------------|
| 853.3431 | 853.3420   | 1.1 | 1.3 | 26.5 | 192.3 | 0.0          | C49 H53 N6 O4 Zn |

Figure S15: Mass spectral data of IR-PYR-Zn complex (C<sub>49</sub>H<sub>53</sub>N<sub>6</sub>O<sub>4</sub>Zn).



Single Mass Analysis

Tolerance = 300.0 mDa / DBE: min = -1.5, max = 50.0

Element prediction: Off

Number of isotope peaks used for i-FIT = 3

Monoisotopic Mass, Even Electron Ions

1 formula(e) evaluated with 1 results within limits (up to 50 best isotopic matches for each mass)

Elements Used:

C: 49-49 H: 53-53 N: 6-6 O: 4-4 Cd: 1-1

Kar Cd

20170116-09 77 (1.265) Cm (77:82)

1: TOF MS ES+  
6.08e+001

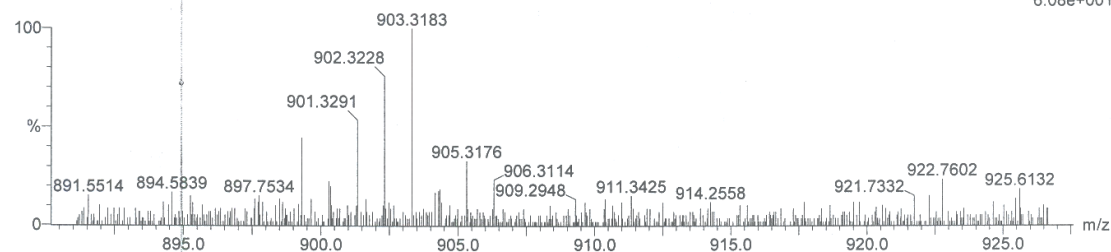

| Mass     | Calc. Mass | mDa | PPM | DBE  | i-FIT | i-FIT (Norm) | Formula                                                          |
|----------|------------|-----|-----|------|-------|--------------|------------------------------------------------------------------|
| 903.3183 | 903.3162   | 2.1 | 2.3 | 26.5 | 129.8 | 0.0          | C <sub>49</sub> H <sub>53</sub> N <sub>6</sub> O <sub>4</sub> Cd |

Figure S16: Mass spectral data of IR-PYR-Cd complex (C<sub>49</sub>H<sub>53</sub>N<sub>6</sub>O<sub>4</sub>Cd).

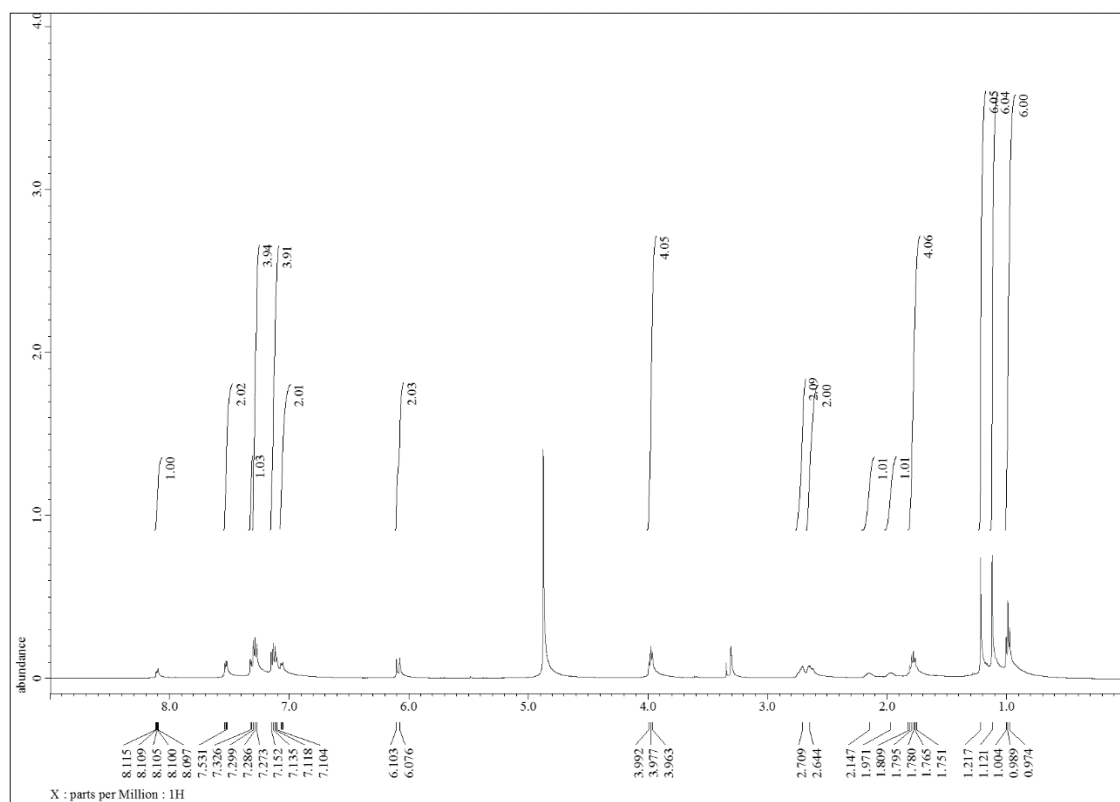

Figure S17: <sup>1</sup>H NMR spectra of I1 in MeOH-d<sub>4</sub>

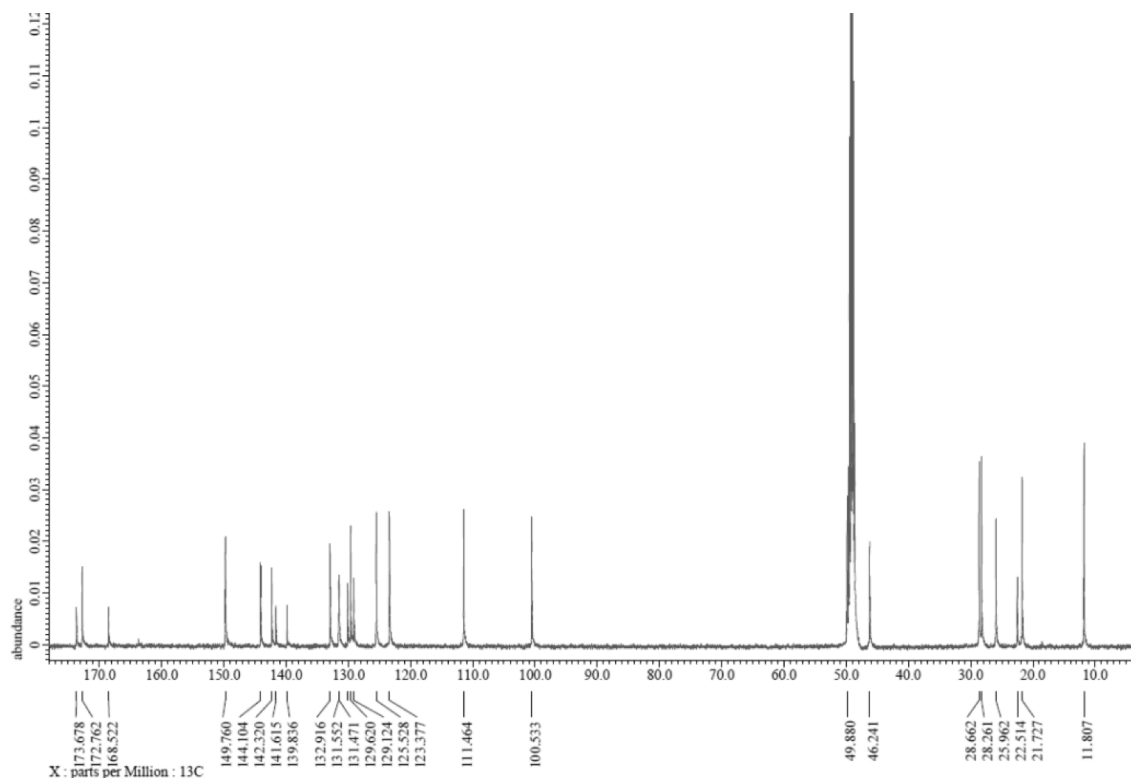

Figure S18:  $^{13}\text{C}$  NMR spectra of I1 in  $\text{MeOH-d}_4$

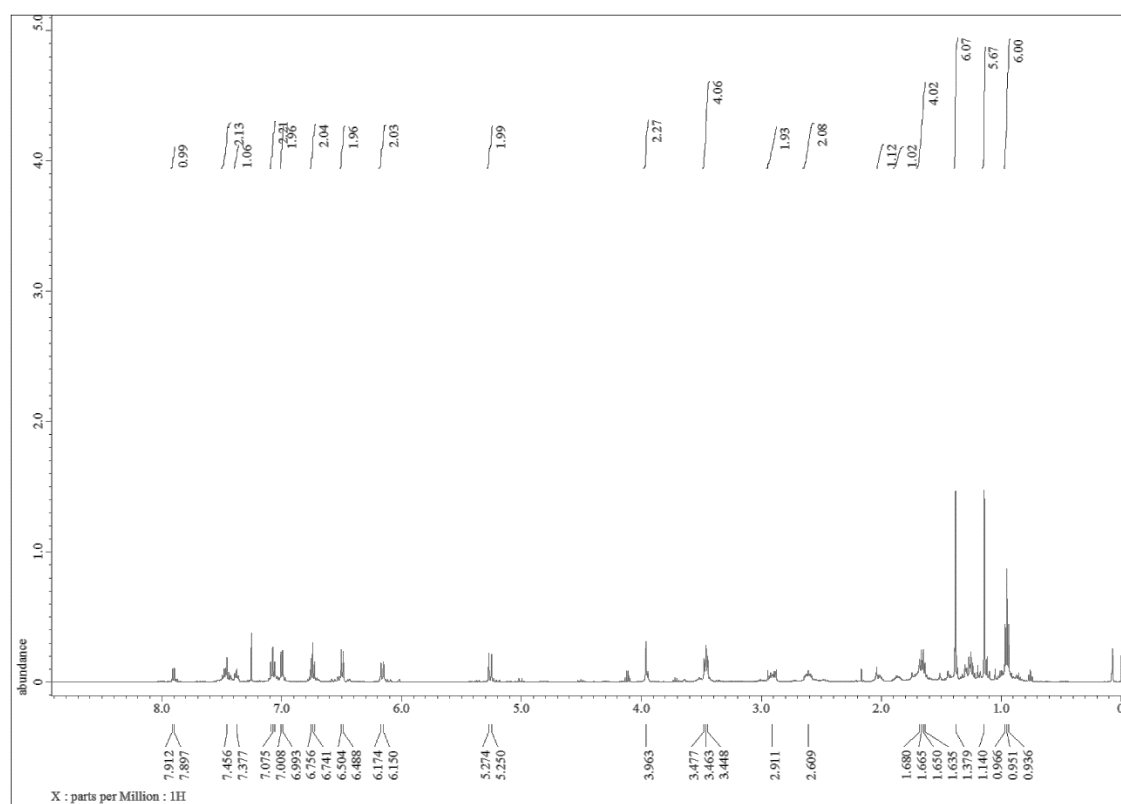

Figure S19:  $^1\text{H}$  NMR spectra of I2 in  $\text{CDCl}_3$

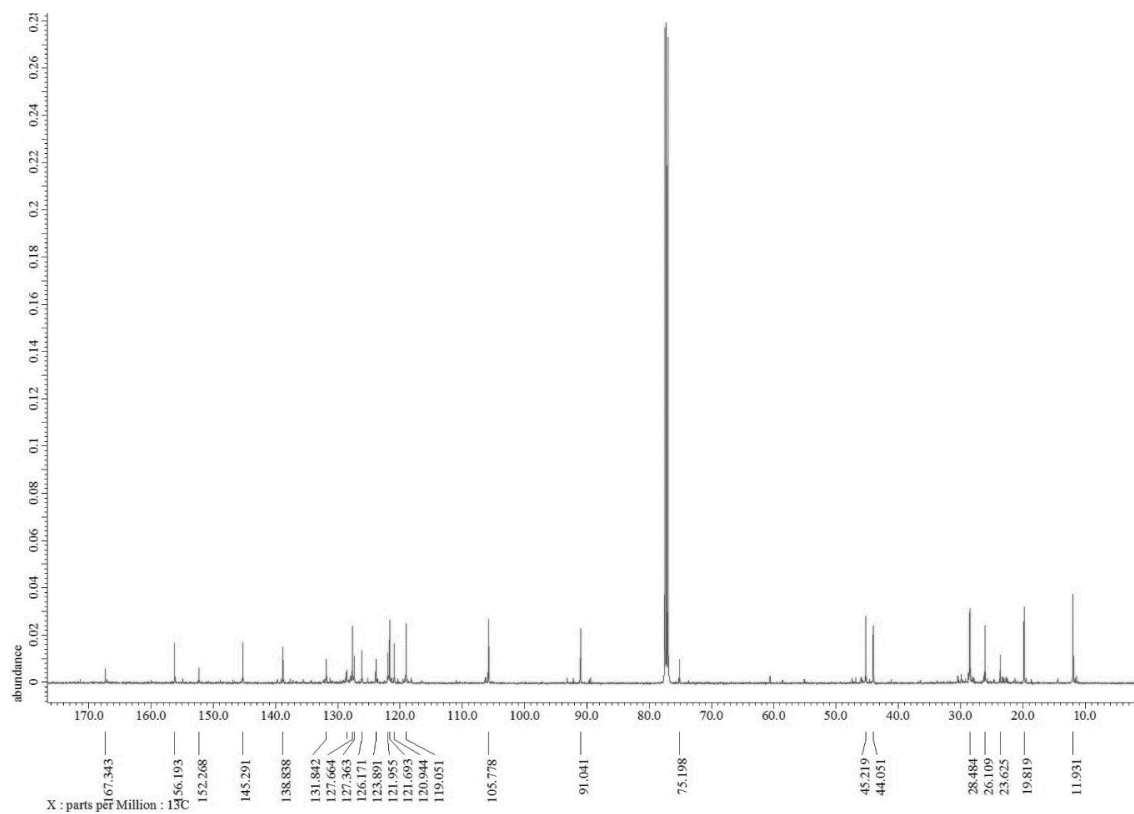

Figure S20:  $^{13}\text{C}$  NMR spectra of I2 in  $\text{CDCl}_3$ .

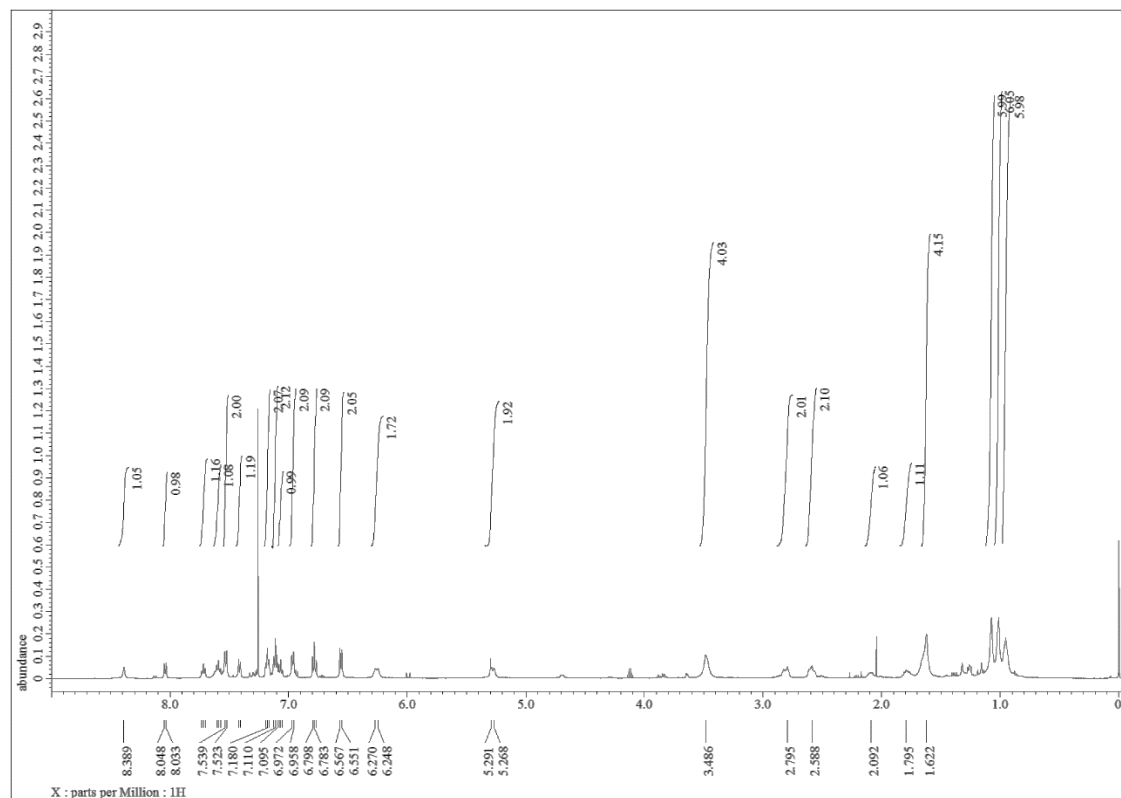

Figure S21:  $^1\text{H}$  NMR spectra of IR-NCS in  $\text{CDCl}_3$ .

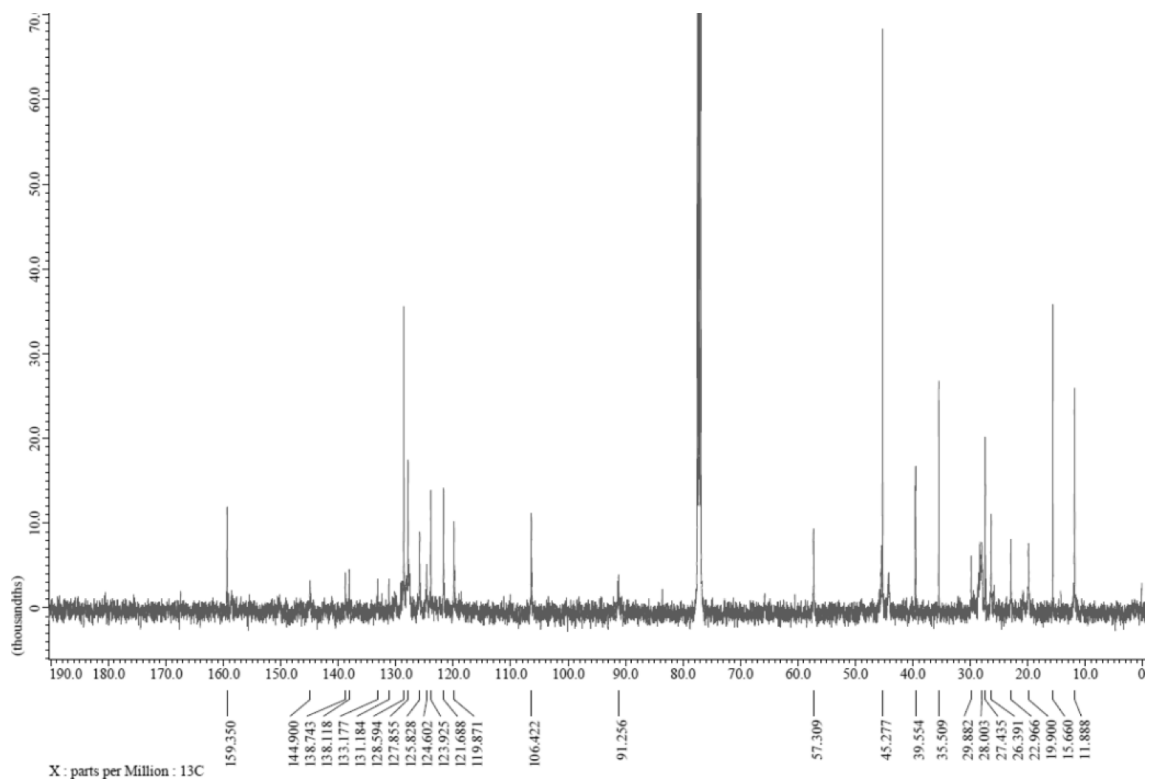

Figure S22:  $^{13}\text{C}$  NMR spectra of IR-NCS in  $\text{CDCl}_3$ .

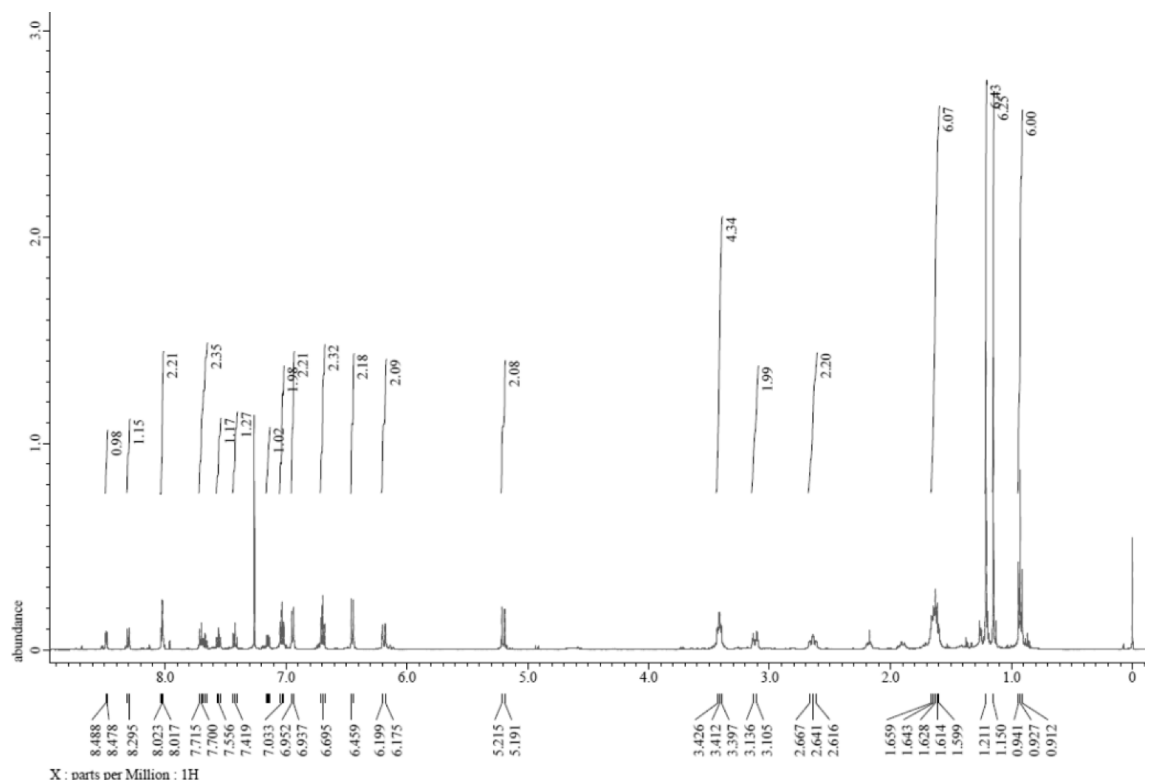

Figure S23:  $^1\text{H}$  NMR spectra of IR-PYR in  $\text{CDCl}_3$ .

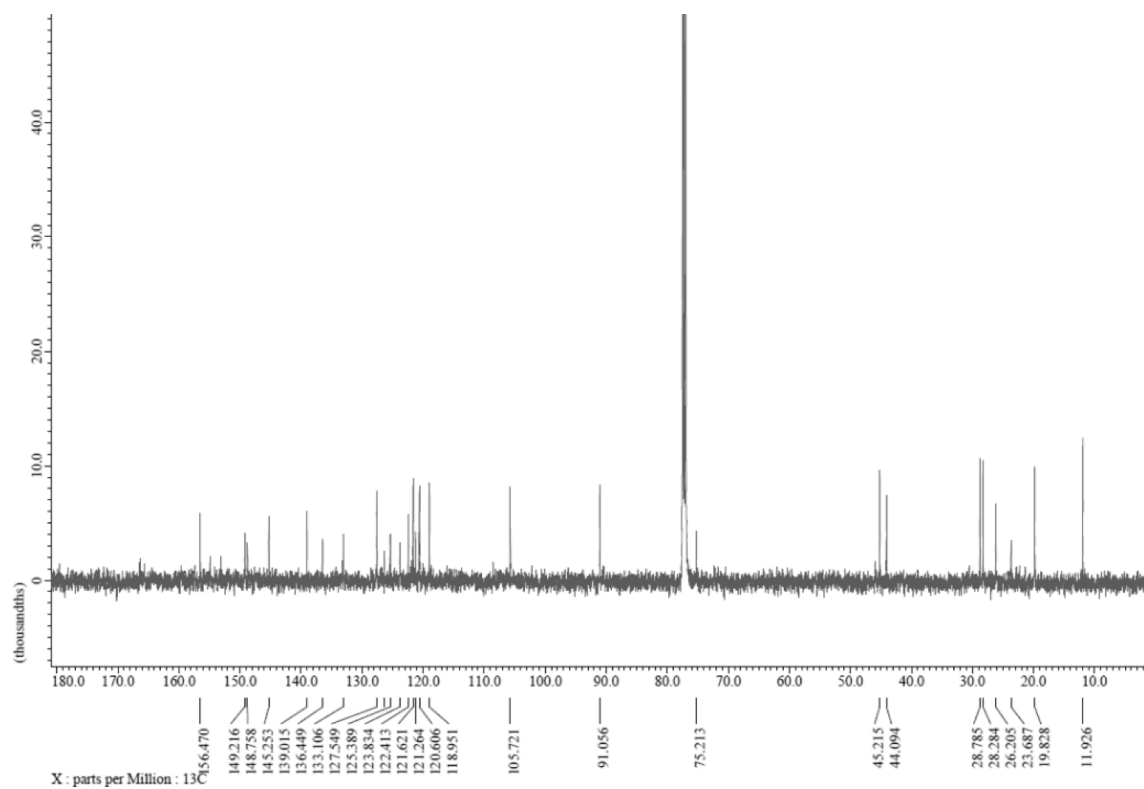

Figure S24:  $^{13}\text{C}$  NMR spectra of IR-PYR in  $\text{CDCl}_3$ .
